# Supplementary material for: Sol–gel preparation of efficient red phosphor Mg2TiO4:Mn4+ and XAFS investigation on the substitution of Mn4+ for Ti4+
Source: Royal Society of Chemistry journal article supplement (doi:10.1039/c3tc30553h), 2013-01-01
Supplement: c3tc30553h.pdf [file c3tc30553h.pdf]

## Supplementary Information

### **Sol-gel Preparation of Efficient Red Phosphor $\text{Mg}_2\text{TiO}_4:\text{Mn}^{4+}$ and XAFS Investigation on the Substitution of $\text{Mn}^{4+}$ for $\text{Ti}^{4+}$**

Tiannan Ye,<sup>a</sup> Shan Li,<sup>a</sup> Xueyan Wu,<sup>b</sup> Miao Xu,<sup>a</sup> Xiao Wei,<sup>a</sup> Kaixue Wang,<sup>a\*</sup>

Hongliang Bao,<sup>c</sup> Jianqiang Wang<sup>c</sup> and Jiesheng Chen<sup>a\*</sup>

<sup>a</sup>*School of Chemistry and Chemical Engineering, Hirano Institute for Materials*

*Innovation, Shanghai Jiao Tong University, Shanghai, 200240, China, E-mail:*

*chemcj@sjtu.edu.cn; k.wang@sjtu.edu.cn, Fax: +86-21-54741297.*

<sup>b</sup>*School of Materials Science and Engineering, Hirano Institute for Materials*

*Innovation, Shanghai Jiao Tong University, Shanghai, 200240, China.*

<sup>c</sup>*Shanghai Synchrotron Radiation Facility, Shanghai Institute of Applied Physics,*

*Chinese Academy of Sciences, Shanghai, 201204, China.*

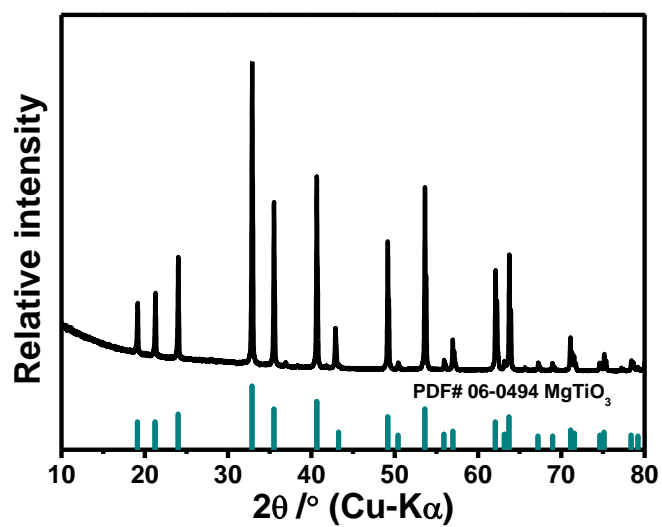

Fig. S1 XRD pattern of the sample with molar ratio Mg/Ti=1:1

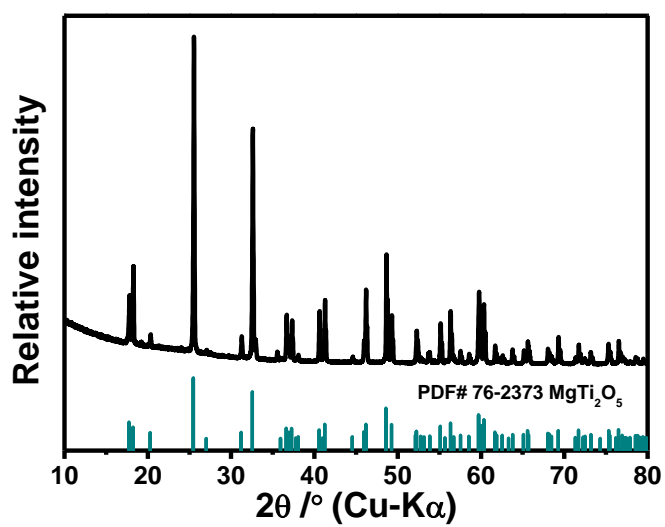

Fig. S2 XRD pattern of the sample with molar ratio Mg/Ti=1:2

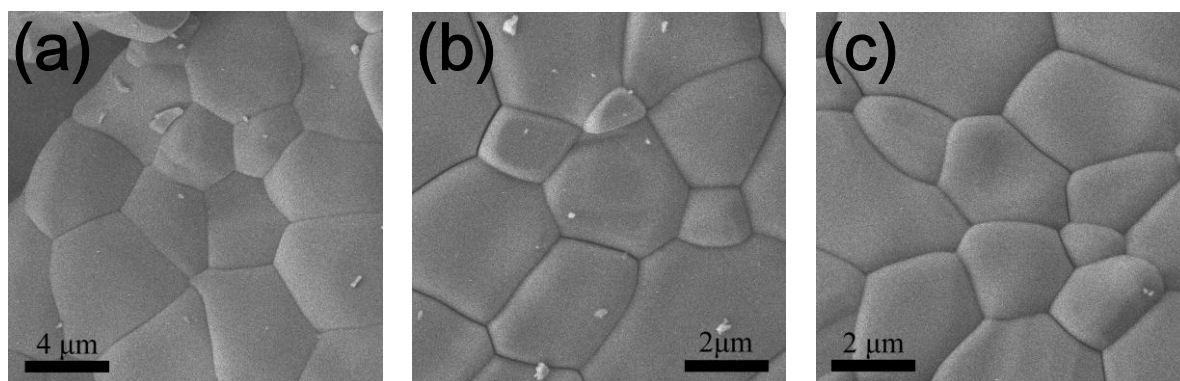

**Fig. S3** SEM images of the samples with a molar ratio of (a) Mg/Ti=2:1, (b) Mg/Ti=1:1, and (c) Mg/Ti=1:2.

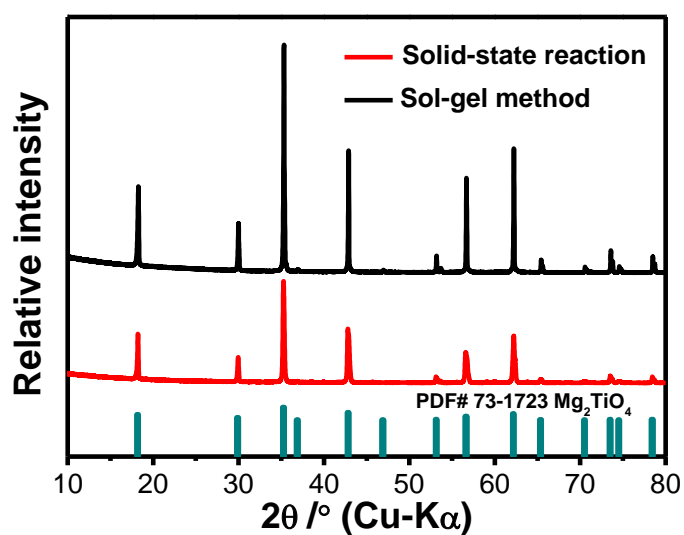

**Fig. S4** The XRD pattern of the as-prepared sample Mg<sub>2</sub>TiO<sub>4</sub>:Mn<sup>4+</sup>  
 $n_{\text{Mn}}/(n_{\text{Mn}}+n_{\text{Ti}})=0.10\%$  phosphor and the reference product Mg<sub>2</sub>TiO<sub>4</sub>:Mn<sup>4+</sup>  
 $n_{\text{Mn}}/(n_{\text{Mn}}+n_{\text{Ti}})=0.10\%$  prepared from solid-state reaction

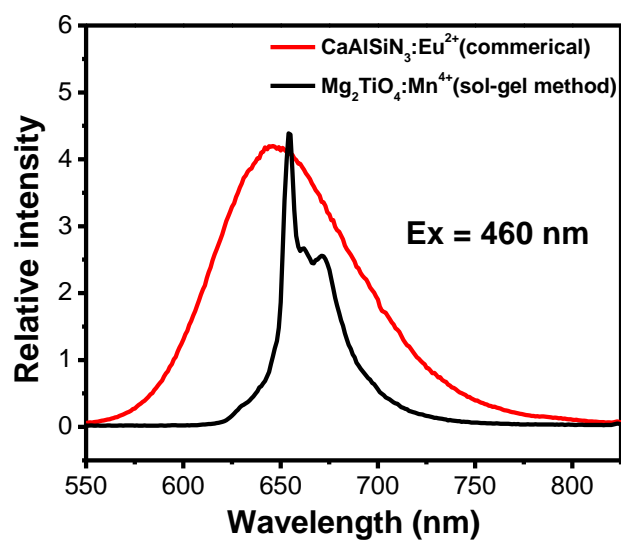

**Fig. S5** The emission spectra of the as-prepared Mg<sub>2</sub>TiO<sub>4</sub>:Mn<sup>4+</sup>,  $n_{\text{Mn}}/(n_{\text{Mn}}+n_{\text{Ti}})=0.10\%$  and the commercial phosphor CaAlSiN<sub>3</sub>:Eu<sup>2+</sup> purchased from Intematix company.

The excitation wavelength is 460 nm.

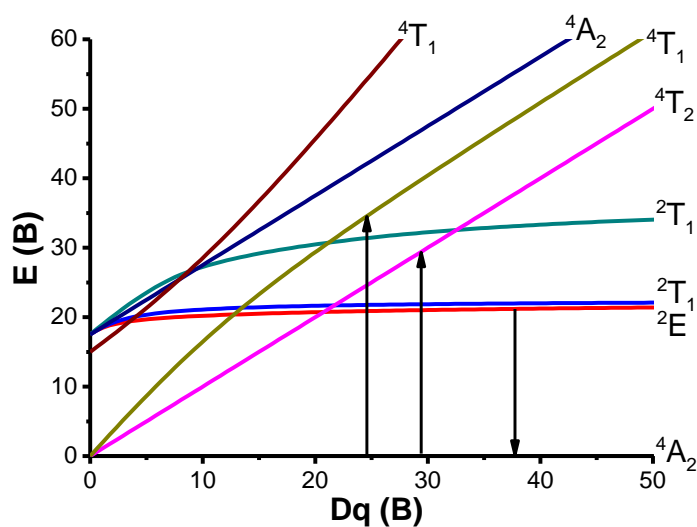

**Fig. S6** Tanabe–Sugano energy level diagram for a 3d<sup>3</sup> system in the octahedral symmetry Mn<sup>4+</sup>.
